# Supplementary material for: Comparison of Survival and Patterns of Recurrence in Gastric Neuroendocrine Carcinoma, Mixed Adenoneuroendocrine Carcinoma, and Adenocarcinoma
Source: PubMed Central journal article supplement (PMC8317013; doi:10.1001/jamanetworkopen.2021.14180), 2021-07-27
Supplement: jamanetwopen-e2114180-s001.pdf [file jamanetwopen-e2114180-s001.pdf]

## Supplemental Online Content

Lin J, Zhao Y, Zhou Y, et al. Comparison of survival and patterns of recurrence in gastric neuroendocrine carcinoma, mixed adenoneuroendocrine carcinoma, and adenocarcinoma. *JAMA Netw Open*. 2021;4(7):e2114180.  
doi:10.1001/jamanetworkopen.2021.14180

**eTable 1.** Distribution of Multicenter Patients

**eTable 2.** Comparison of Stages Between Different Pathological Types in the Original and the Matched Data Sets

**eTable 3.** Univariable and Multivariable Logistic Regression Analyses of Factors Potentially Associated with Distant Recurrence in the Matched Data Sets of AC and NEC

**eTable 4.** Univariate and Multivariable Logistic Regression Analyses of Factors Potentially Associated with Distant Recurrence in the Matched Data Sets of AC and MANEC

**eTable 5.** Univariable and Multivariable Logistic Regression Analyses of Pathological Factors Potentially Associated with Distant Recurrence in Patients with NEC and MANEC

**eFigure 1.** Diagram Representing the Selection of the Study Population

**eFigure 2.** Incidence of Recurrence According to Histologic Subtype in Original Data and Matched Data

**eFigure 3.** Kaplan-Meier Survival Curves for Patients With Gastric Neuroendocrine Carcinoma (NEC), Mixed Adenoneuroendocrine Carcinoma (MANEC), or Adenocarcinoma (AC) in Original Data

**eFigure 4.** Recurrence Patterns According to Histologic Subtype in the Original Data

**eFigure 5.** Kaplan-Meier Survival Curves for Postrecurrence Survival for Patients With Different Histologic Subtypes in the Matched Data

**eFigure 6.** Kaplan-Meier Survival Curves for Patients With Gastric Neuroendocrine Carcinoma (NEC) and Adenocarcinoma (AC) in High-Volume Centers

**eFigure 7.** Recurrence Patterns According to Histologic Subtype in the Matched Data

**eFigure 8.** Kaplan-Meier Survival Curves for Patients With Gastric Mixed Adenoneuroendocrine Carcinoma (MANEC) and Adenocarcinoma (AC) in High-Volume Centers

This supplemental material has been provided by the authors to give readers additional information about their work.

**eTable 1.** Distribution of Multicenter Patients

| Center                                                                         | number of patients |
|--------------------------------------------------------------------------------|--------------------|
| Fujian Medical University Union Hospital                                       | 155                |
| West district of The First Affiliated Hospital of USTC                         | 115                |
| The Affiliated Hospital of Qingdao University                                  | 84                 |
| Cancer Hospital Affiliated to Chinese Academy of Medical Sciences              | 83                 |
| The First Affiliated Hospital of Fujian Medical University                     | 80                 |
| Huashan Hospital Affiliated to Fudan University                                | 66                 |
| The First Affiliated Hospital of Anhui Medical University                      | 53                 |
| Yantai Yuhuangding Hospital                                                    | 51                 |
| Renji Hospital Affiliated to Shanghai Jiaotong University                      | 50                 |
| The Affiliated Hospital of Putian University                                   | 43                 |
| The First Hospital of Putian                                                   | 36                 |
| Henan Cancer Hospital                                                          | 30                 |
| Fujian Provincial Hospital                                                     | 13                 |
| The Second People's Hospital of Liaocheng                                      | 7                  |
| Tianjin Medical University General Hospital                                    | 6                  |
| The First Affiliated Hospital of Nanjing Medical University                    | 6                  |
| Guangdong Provincial People's Hospital                                         | 5                  |
| Quanzhou First Hospital Affiliated to Fujian Medical University                | 5                  |
| The First Affiliated Hospital of Soochow University                            | 4                  |
| Ruijin Hospital Affiliated to Shanghai Jiao Tong University School of Medicine | 4                  |
| Zhangzhou Affiliated Hospital of Fujian Medical University                     | 3                  |
| Meizhou People's Hospital                                                      | 3                  |
| Second Affiliated Hospital of Nanchang University                              | 2                  |

**eTable 2.** Comparison of Stages Between Different Pathological Types in the Original and the Matched Data Sets

| Baseline Variable       | Before matching   |                     |            | After matching    |                     |            |
|-------------------------|-------------------|---------------------|------------|-------------------|---------------------|------------|
|                         | AC<br>(n=2785, %) | NEC<br>(n=503, %)   | P<br>value | AC<br>(n=1573, %) | NEC<br>(n=500, %)   | P<br>value |
| Age, median<br>(IQR), y | 61 (54-68)        | 64 (58-69)          | <.001      | 63 (58-69)        | 64 (58-69)          | .40        |
| Sex                     |                   |                     | .002       |                   |                     | .74        |
| Male                    | 2035 (73.1)       | 400 (79.5)          |            | 1263 (80.3)       | 398 (79.6)          |            |
| Female                  | 750 (26.9)        | 103 (20.5)          |            | 310 (19.7)        | 102 (20.4)          |            |
| Pathologic TNM<br>stage |                   |                     | <.001      |                   |                     | .32        |
| I                       | 862 (31.0)        | 47 (9.3)            |            | 186 (11.8)        | 47 (9.4)            |            |
| II                      | 659 (23.7)        | 144 (28.6)          |            | 433 (27.5)        | 144 (28.8)          |            |
| III                     | 1264 (45.4)       | 312 (62.0)          |            | 954 (60.6)        | 309 (61.8)          |            |
|                         | AC<br>(n=2785, %) | MANEC<br>(n=401, %) | P<br>value | AC<br>(n=1355, %) | MANEC<br>(n=394, %) | P<br>value |
| Age, median<br>(IQR), y | 61 (54-68)        | 64 (58-70)          | <.001      | 63 (57-69)        | 64 (58-70)          | .09        |
| Sex                     |                   |                     | .03        |                   |                     | .69        |
| Male                    | 2035 (73.1)       | 313 (78.1)          |            | 1082 (79.9)       | 311 (78.9)          |            |
| Female                  | 750 (26.9)        | 88 (21.9)           |            | 273 (20.1)        | 83 (21.1)           |            |
| Pathologic TNM<br>stage |                   |                     | <.001      |                   |                     | .56        |
| I                       | 862 (31.0)        | 48 (12.0)           |            | 190 (14.0)        | 48 (12.2)           |            |
| II                      | 659 (23.7)        | 105 (26.2)          |            | 361 (26.6)        | 102 (25.9)          |            |
| III                     | 1264 (45.4)       | 248 (61.8)          |            | 804 (59.3)        | 244 (61.9)          |            |

Abbreviations: NEC, neuroendocrine carcinoma; MANEC, mixed adenoneuroendocrine carcinoma; AC, adenocarcinoma; Sdiff, standardized difference.

**eTable 3.** Univariable and Multivariable Logistic Regression Analyses of Factors Potentially Associated with Distant Recurrence in the Matched Data Sets of AC and NEC

| Clinicopathological features         | Univariable Analysis |                 | Multivariable analysis |                 |
|--------------------------------------|----------------------|-----------------|------------------------|-----------------|
|                                      | Odds Ratio (CI)      | P               | Odds Ratio (CI)        | P               |
| Age                                  | 1.02 (1.00-1.03)     | <b>.02</b>      | 1.02 (1.00-1.03)       | <b>.04</b>      |
| Sex                                  |                      |                 |                        |                 |
| Male                                 | 1                    |                 | 1                      |                 |
| Female                               | 0.63 (0.46-0.86)     | <b>.003</b>     | 0.66 (0.47-0.93)       | <b>.02</b>      |
| Center volume                        |                      |                 |                        |                 |
| Low                                  | 1                    |                 |                        |                 |
| High                                 | 1.04 (0.39-2.78)     | .94             |                        |                 |
| Location                             |                      |                 |                        |                 |
| Lower                                | 1                    |                 | —                      |                 |
| Middle                               | 1.15 (0.82-1.61)     | .42             | —                      | .17             |
| Upper                                | 1.47 (1.12-1.94)     | <b>.006</b>     | —                      | .59             |
| Mix                                  | 1.51 (1.03-2.22)     | <b>.04</b>      | —                      | .61             |
| Tumor size                           | 1.16 (1.11-1.22)     | <b>&lt;.001</b> | —                      | .59             |
| Lymph nodes examined                 | 1.00 (1.00-1.01)     | .43             |                        |                 |
| The number of metastatic lymph nodes | 1.08 (1.07-1.10)     | <b>&lt;.001</b> | 1.06 (1.05-1.08)       | <b>&lt;.001</b> |
| Vascular invasion                    | 1.48 (1.17-1.88)     | <b>.001</b>     | —                      | .17             |
| Neural invasion                      | 1.30 (1.03-1.66)     | <b>.03</b>      | —                      | .10             |
| Pathologic T stage                   |                      |                 |                        |                 |
| T1-2                                 | 1                    |                 | 1                      |                 |
| T3-4                                 | 4.43 (2.92-6.71)     | <b>&lt;.001</b> | 2.19 (1.40-3.41)       | <b>.001</b>     |
| Pathologic N stage                   |                      |                 |                        |                 |
| N0                                   | 1                    |                 | 1                      |                 |
| N1-3                                 | 5.43 (3.64-8.10)     | <b>&lt;.001</b> | 2.94 (1.89-4.55)       | <b>&lt;.001</b> |
| Type of resection                    |                      |                 |                        |                 |
| Total gastrectomy                    | 1                    |                 | 1                      |                 |
| Subtotal gastrectomy                 | 0.57 (0.45-0.72)     | <b>&lt;.001</b> | 0.77 (0.59-1.00)       | <b>.05</b>      |
| Received neoadjuvant chemotherapy    |                      |                 |                        |                 |
| No                                   | 1                    |                 | 1                      |                 |
| Yes                                  | 2.95 (1.57-5.55)     | <b>.001</b>     | 2.86 (1.44-5.67)       | <b>.003</b>     |
| Received adjuvant chemotherapy       |                      |                 |                        |                 |
| No                                   | 1                    |                 | 1                      |                 |
| Yes                                  | 1.46 (1.13-1.89)     | <b>.004</b>     | —                      | .91             |
| Pathological type                    |                      |                 |                        |                 |
| AC                                   | 1                    |                 | 1                      |                 |
| NEC                                  | 1.46 (1.12-1.89)     | <b>.005</b>     | 2.22 (1.66-2.98)       | <b>&lt;.001</b> |

Abbreviations: NEC, neuroendocrine carcinoma; AC, adenocarcinoma; CI, confidence interval.

**eTable 4.** Univariate and Multivariable Logistic Regression Analyses of Factors Potentially Associated with Distant Recurrence in the Matched Data Sets of AC and MANEC

| Clinicopathological features         | Univariable Analysis |                 | Multivariable analysis |                 |
|--------------------------------------|----------------------|-----------------|------------------------|-----------------|
|                                      | Odds Ratio (CI)      | P               | Odds Ratio (CI)        | P               |
| Age                                  | 1.01 (1.00-1.03)     | .09             |                        |                 |
| Sex                                  |                      |                 |                        |                 |
| Male                                 | 1                    |                 | 1                      |                 |
| Female                               | 0.67 (0.48-0.94)     | <b>.02</b>      | 0.69 (0.48-1.00)       | <b>.05</b>      |
| Center volume                        |                      |                 |                        |                 |
| Low                                  | 1                    |                 |                        |                 |
| High                                 | 0.81 (0.22-2.96)     | .75             |                        |                 |
| Location                             |                      |                 |                        |                 |
| Lower                                | 1                    |                 | —                      |                 |
| Middle                               | 1.03 (0.73-1.47)     | .86             | —                      | .07             |
| Upper                                | 1.54 (1.14-2.08)     | <b>.005</b>     | —                      | .06             |
| Mix                                  | 1.51 (0.99-2.29)     | .06             | —                      | .63             |
| Tumor size                           | 1.17 (1.11-1.22)     | <b>&lt;.001</b> | —                      | .97             |
| Lymph nodes examined                 | 1.00 (0.99-1.01)     | .61             |                        |                 |
| The number of metastatic lymph nodes | 1.09 (1.07-1.11)     | <b>&lt;.001</b> | 1.07 (1.05-1.09)       | <b>&lt;.001</b> |
| Vascular invasion                    | 1.62 (1.25-2.09)     | <b>&lt;.001</b> | —                      | .73             |
| Neural invasion                      | 1.48 (1.14-1.92)     | <b>.003</b>     | —                      | .43             |
| Pathologic T stage                   |                      |                 |                        |                 |
| T1-2                                 | 1                    |                 | 1                      |                 |
| T3-4                                 | 6.81 (4.11-11.27)    | <b>&lt;.001</b> | 3.52 (2.08-5.97)       | <b>&lt;.001</b> |
| Pathologic N stage                   |                      |                 |                        |                 |
| N0                                   | 1                    |                 | 1                      |                 |
| N1-3                                 | 5.12 (3.35-7.84)     | <b>&lt;.001</b> | 2.08 (1.30-3.32)       | <b>.002</b>     |
| Type of resection                    |                      |                 |                        |                 |
| Total gastrectomy                    | 1                    |                 |                        |                 |
| Subtotal gastrectomy                 | 0.63 (0.48-0.81)     | <b>&lt;.001</b> |                        |                 |
| Received neoadjuvant chemotherapy    |                      |                 |                        |                 |
| No                                   | 1                    |                 | 1                      |                 |
| Yes                                  | 2.89 (1.41-5.92)     | <b>.004</b>     | 2.97 (1.40-6.33)       | <b>.005</b>     |
| Received adjuvant chemotherapy       |                      |                 |                        |                 |
| No                                   | 1                    |                 | 1                      |                 |
| Yes                                  | 1.78 (1.34-2.36)     | <b>&lt;.001</b> | —                      | .48             |
| Pathological type                    |                      |                 |                        |                 |
| AC                                   | 1                    |                 | 1                      |                 |
| MANEC                                | 1.39 (1.03-1.86)     | <b>.03</b>      | 1.70 (1.24-2.34)       | <b>.001</b>     |

Abbreviations: MANEC, mixed adenoneuroendocrine carcinoma; AC, adenocarcinoma; CI, confidence interval.

**eTable 5.** Univariable and Multivariable Logistic Regression Analyses of Pathological Factors Potentially Associated with Distant Recurrence in Patients with NEC and MANEC

| Clinicopathological features | Univariable Analysis    |                 | Multivariable analysis  |             |
|------------------------------|-------------------------|-----------------|-------------------------|-------------|
|                              | Odds Ratio (95%CI)      | P               | Odds Ratio (95%CI)      | P           |
| Location                     |                         |                 |                         |             |
| Lower                        | 1                       |                 | —                       |             |
| Middle                       | <b>0.50 (0.29-0.86)</b> | <b>.01</b>      | —                       | .08         |
| Upper                        | 0.77 (0.52-1.14)        | .20             | —                       | .51         |
| Mix                          | 0.72 (0.32-1.60)        | .42             | —                       | .87         |
| Tumor size                   | 1.04 (0.98-1.11)        | .20             |                         |             |
| Lymph nodes examined         | 1.01 (0.99-1.02)        | .47             |                         |             |
| Vascular invasion            | 1.16 (0.80-1.66)        | .44             |                         |             |
| Neural invasion              | 0.90 (0.60-1.33)        | .58             |                         |             |
| Ki-67 (%)                    |                         |                 |                         |             |
| ≤20                          | 1                       |                 | —                       |             |
| >20                          | <b>2.37 (1.05-5.37)</b> | <b>.04</b>      | —                       | .11         |
| Unknown                      | 0.78 (0.28-2.18)        | .63             | —                       | .47         |
| Pathological type            |                         |                 |                         |             |
| NEC                          | 1                       |                 |                         |             |
| MANEC                        | 0.96 (0.68-1.34)        | .79             |                         |             |
| Pathologic T stage           |                         |                 |                         |             |
| T1-2                         | 1                       |                 | 1                       |             |
| T3-4                         | <b>3.47 (1.94-6.19)</b> | <b>&lt;.001</b> | <b>2.84 (1.57-5.14)</b> | <b>.001</b> |
| Pathologic N stage           |                         |                 |                         |             |
| N0                           | 1                       |                 | 1                       |             |
| N1-3                         | <b>2.40 (1.57-3.65)</b> | <b>&lt;.001</b> | <b>2.01 (1.31-3.10)</b> | <b>.002</b> |

Abbreviations: NEC, neuroendocrine carcinoma; MANEC, mixed adenoneuroendocrine carcinoma; CI, confidence interval.

**eFigure 1.** Diagram Representing the Selection of the Study Population

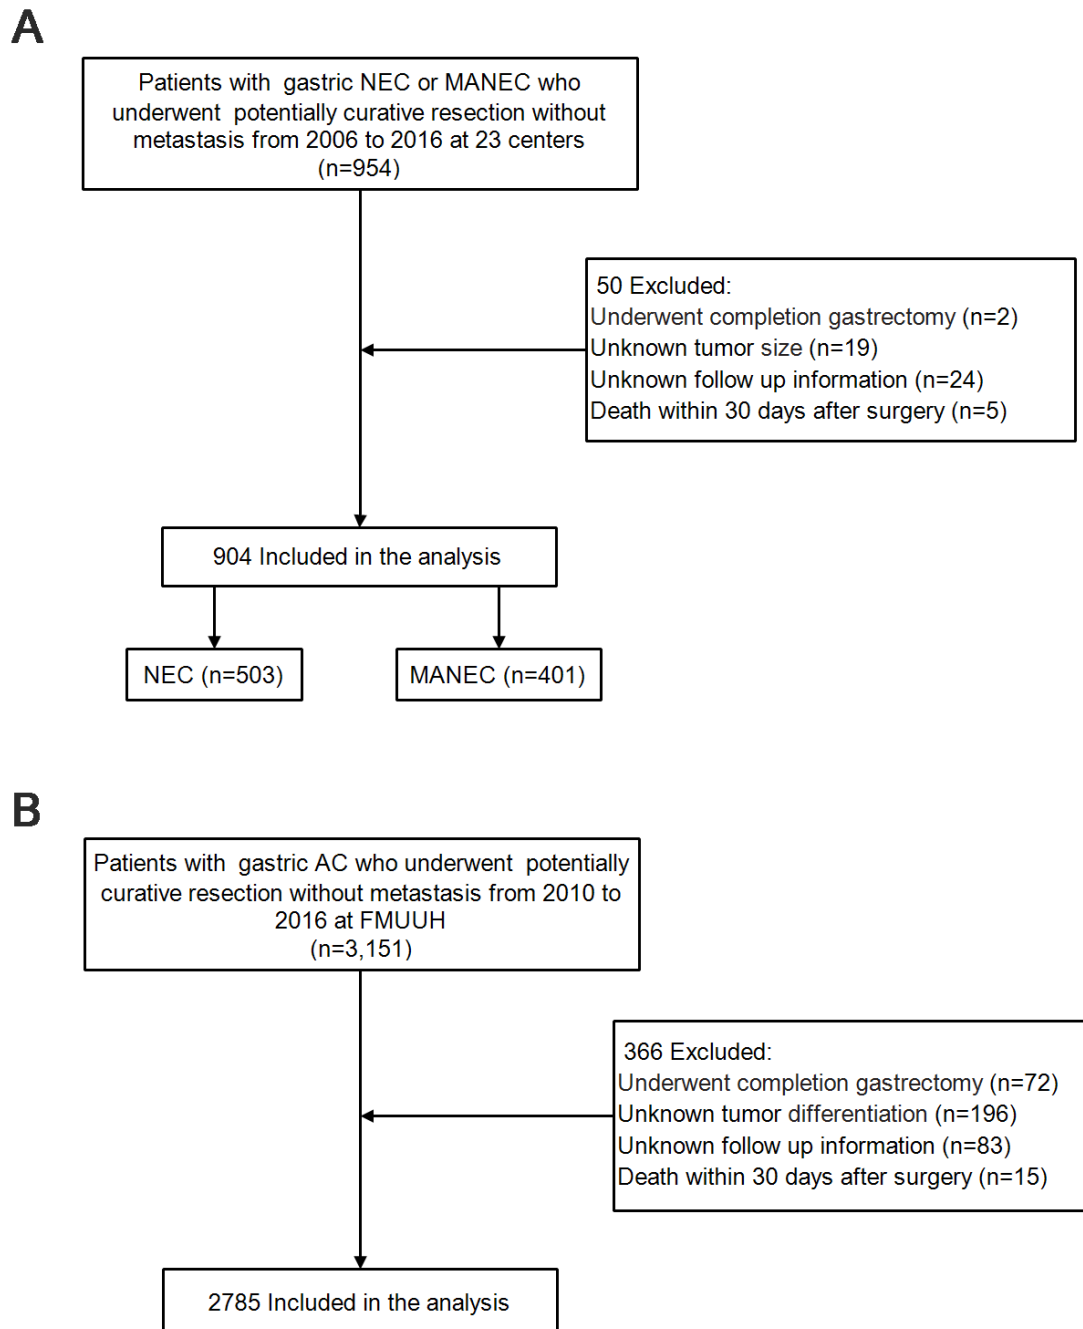

(A) Patients with gastric neuroendocrine carcinoma (NEC) and mixed adenoneuroendocrine carcinoma (MANEC). (B) Patients with gastric adenocarcinoma (AC). Abbreviations: FMUUH, Fujian Medical University Union Hospital.

**eFigure 2.** Incidence of Recurrence According to Histologic Subtype in Original Data and Matched Data

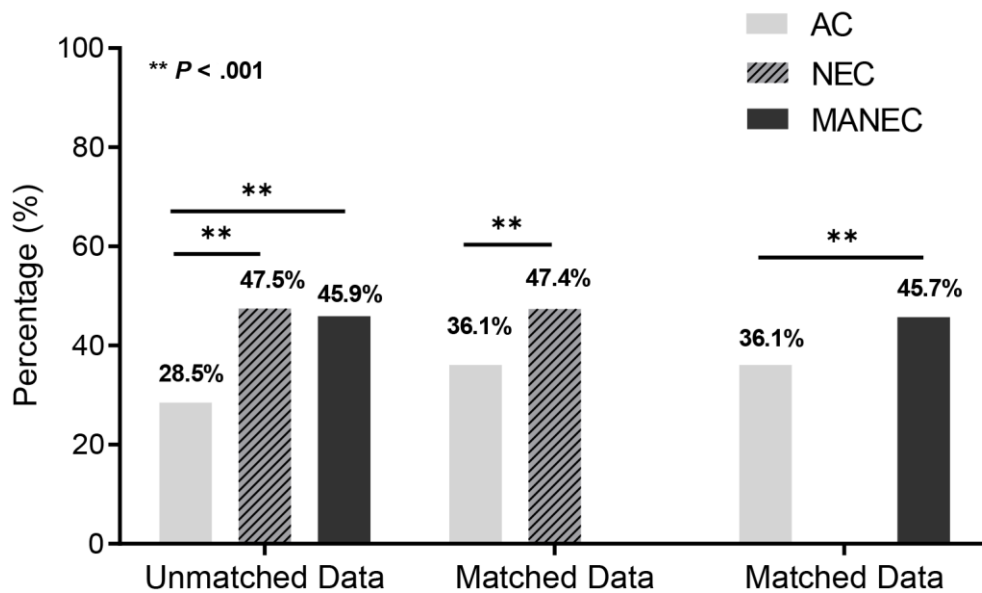

Abbreviations: NEC, neuroendocrine carcinoma. MANEC, mixed adenoneuroendocrine carcinoma. AC, adenocarcinoma



**eFigure 3.** Kaplan-Meier Survival Curves for Patients With Gastric Neuroendocrine Carcinoma (NEC), Mixed Adenoneuroendocrine Carcinoma (MANEC), or Adenocarcinoma (AC) in Original Data

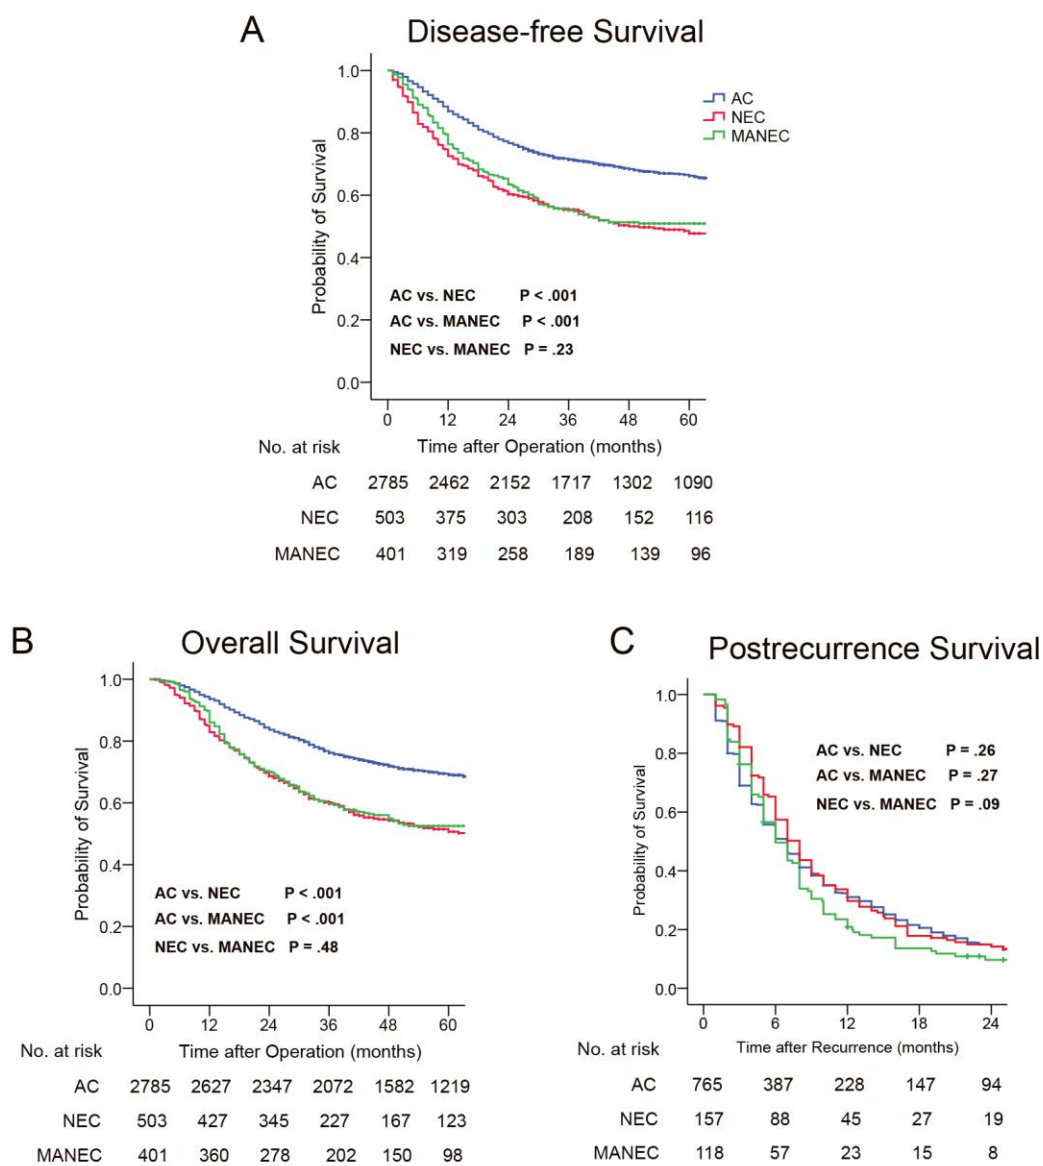

(A) Disease-free survival (DFS), (B) Overall survival (OS), and (C) postrecurrence survival (PRS).

**eFigure 4.** Recurrence Patterns According to Histologic Subtype in the Original Data

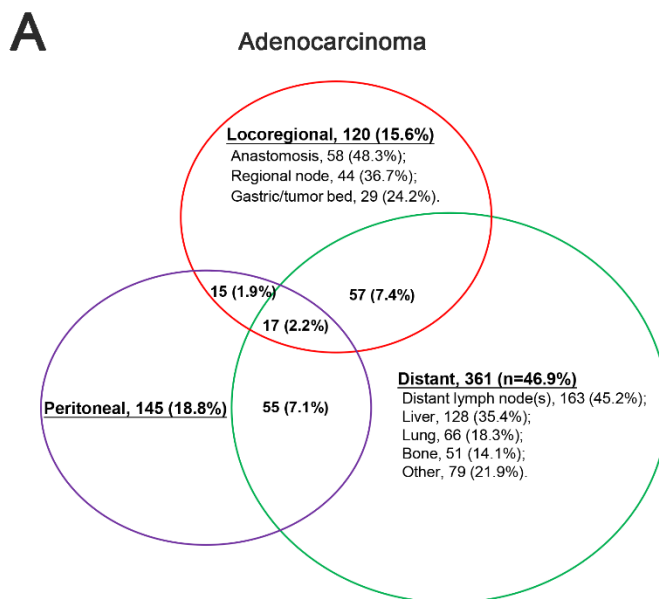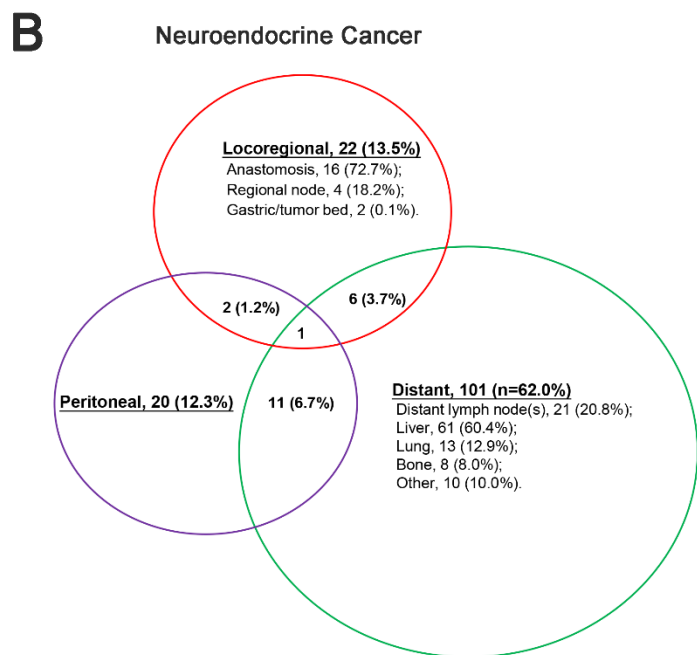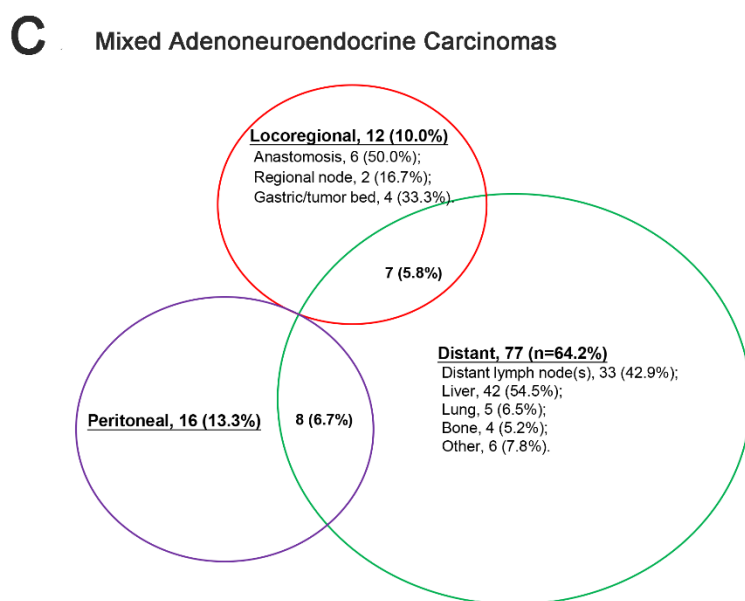

(A) adenocarcinoma, (B) neuroendocrine carcinoma, and (C) mixed adenoneuroendocrine carcinoma. Sizes of circles are proportional to the number of patients.

**eFigure 5.** Kaplan-Meier Survival Curves for Postrecurrence Survival for Patients With Different Histologic Subtypes in the Matched Data

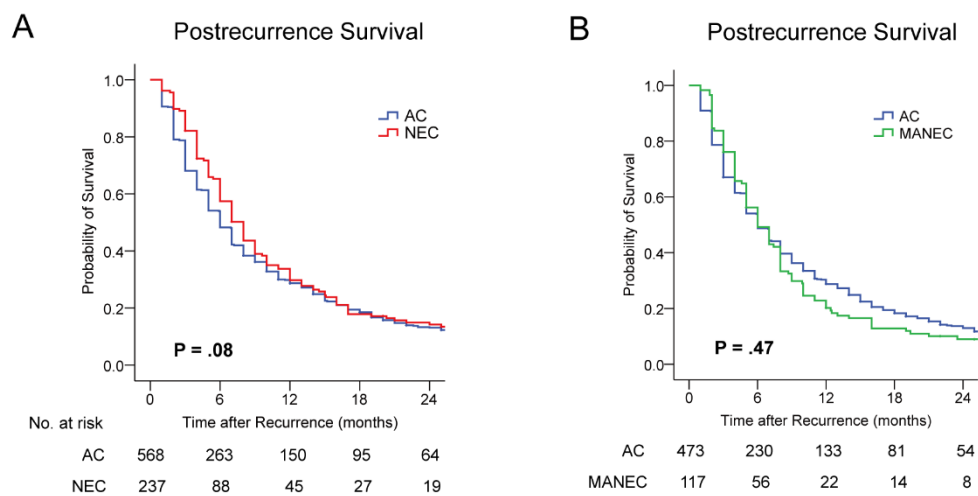

(A) gastric neuroendocrine carcinoma (NEC) versus adenocarcinoma (AC); (B) gastric mixed adenoneuroendocrine carcinoma (MANEC) versus AC.

**eFigure 6.** Kaplan-Meier Survival Curves for Patients With Gastric Neuroendocrine Carcinoma (NEC) and Adenocarcinoma (AC) in High-Volume Centers

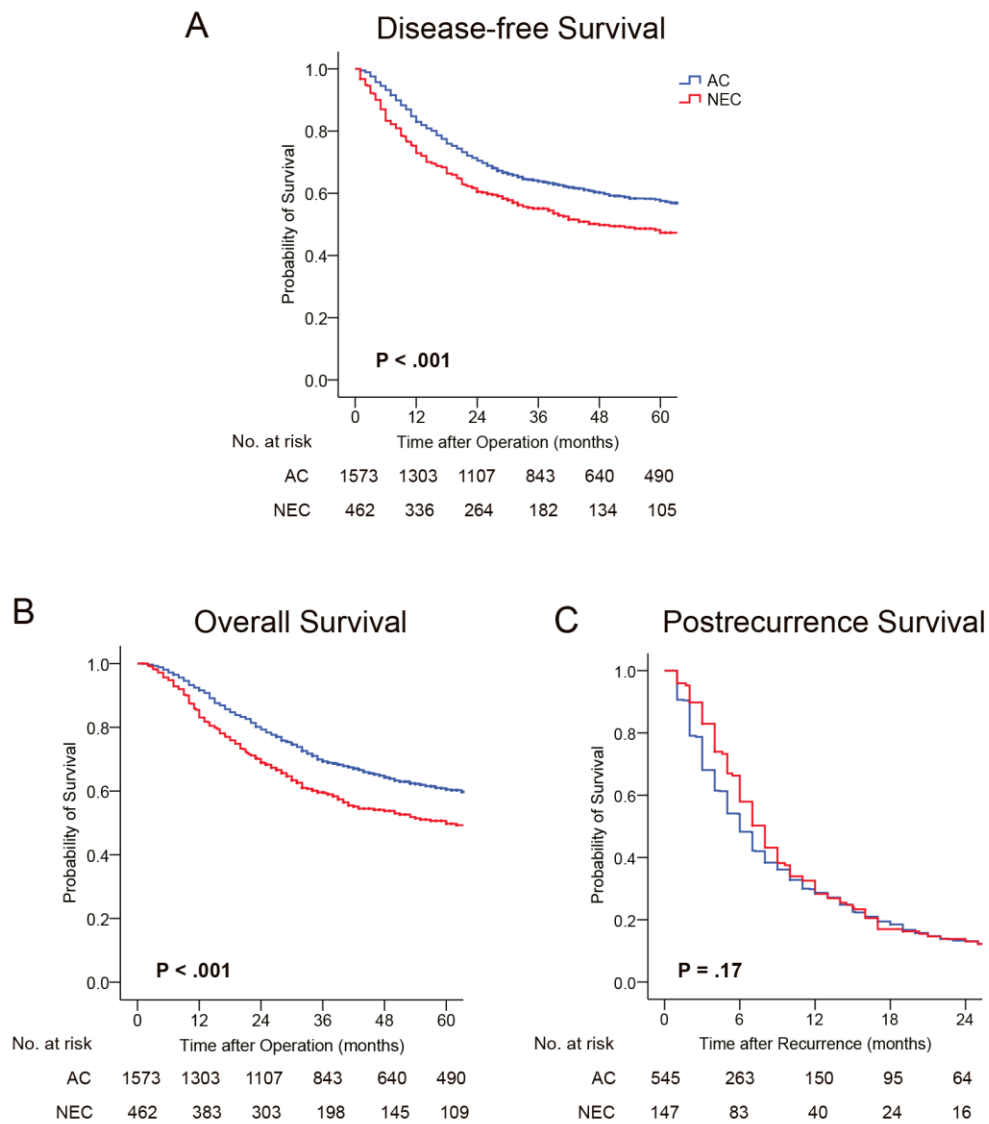

(A) Disease-free survival (DFS), (B) Overall survival (OS), and (C) postrecurrence survival (PRS).

**eFigure 7.** Recurrence Patterns According to Histologic Subtype in the Matched Data

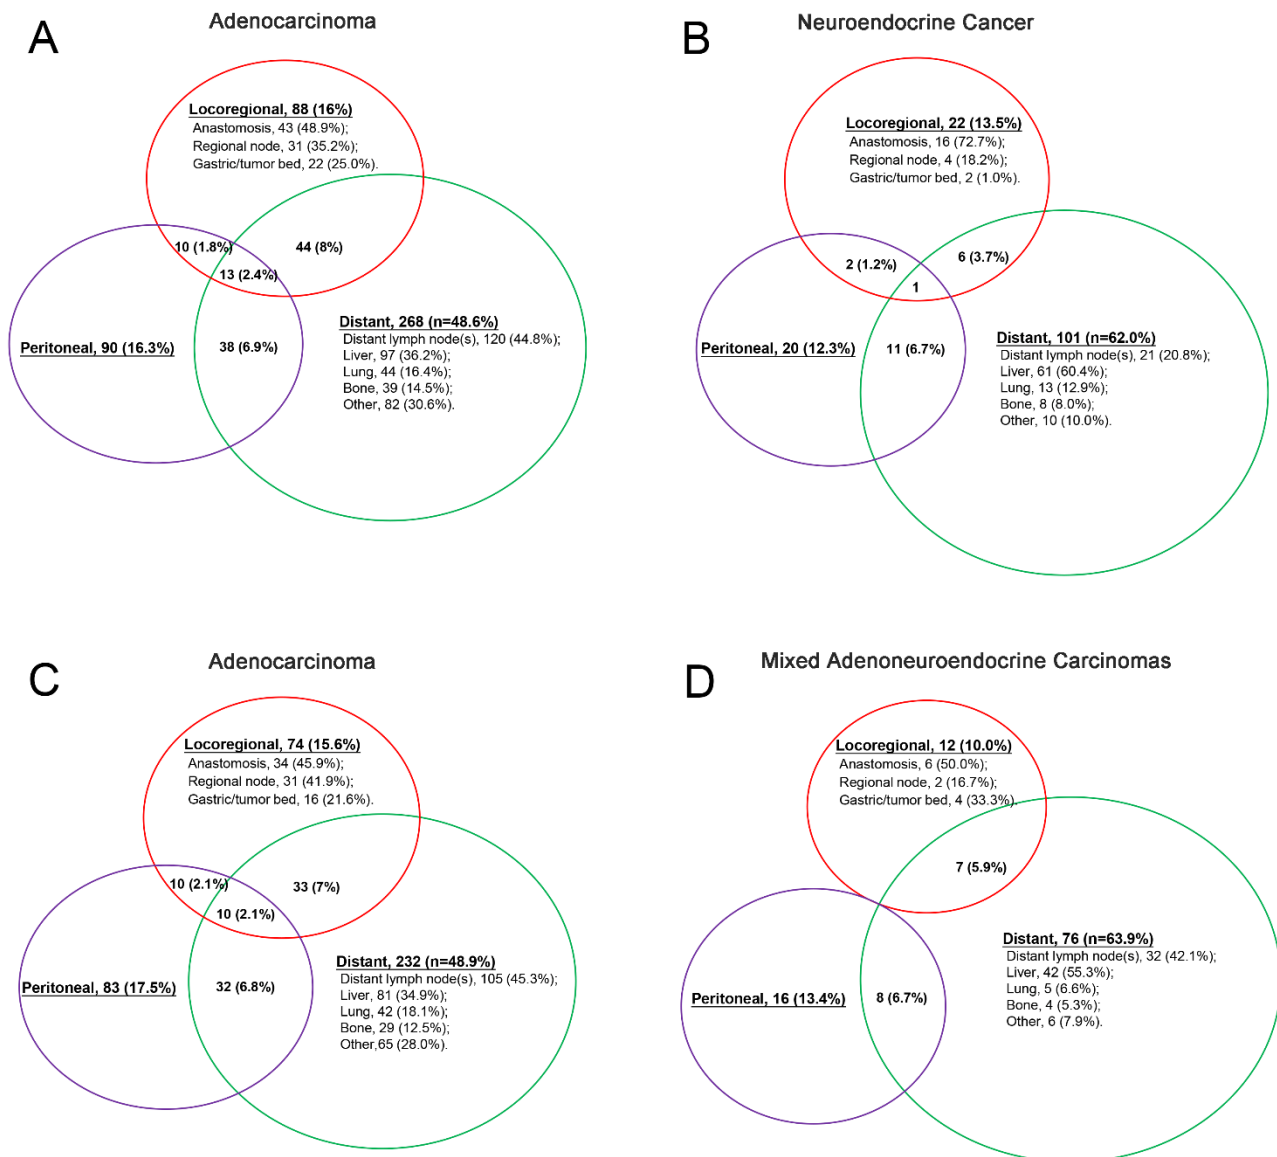

(A-B) matched adenocarcinoma and neuroendocrine carcinoma patients; (C-D) matched adenocarcinoma and mixed adenoneuroendocrine carcinoma patients. Sizes of circles are proportional to the number of patients.

**eFigure 8.** Kaplan-Meier Survival Curves for Patients With Gastric Mixed Adenoneuroendocrine Carcinoma (MANEC) and Adenocarcinoma (AC) in High-Volume Centers

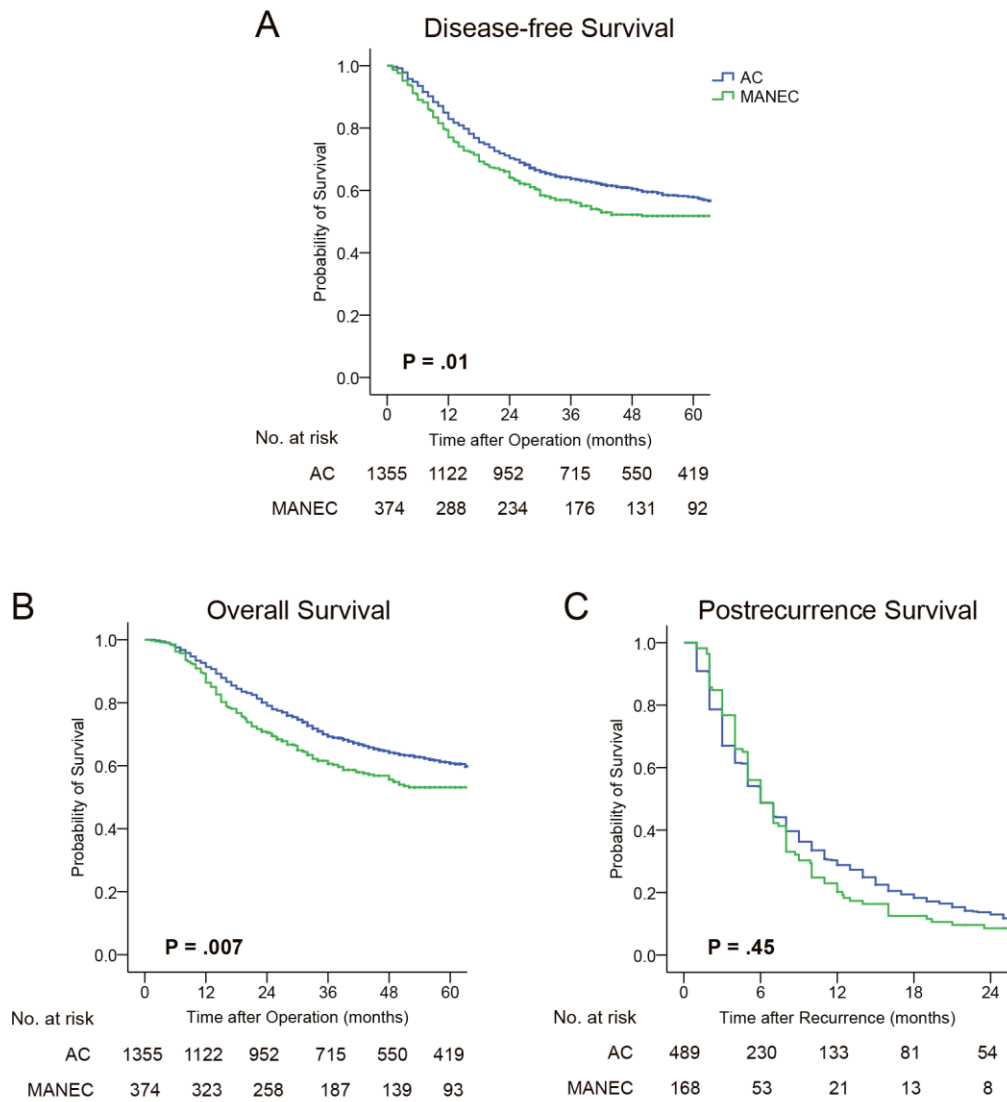

(A) Disease-free survival (DFS), (B) Overall survival (OS), and (C) postrecurrence survival (PRS).
